# Supplementary figures and images for: The development of a sensitive and rapid liquid-phase microextraction method followed by liquid chromatography mass spectrometry for the determination of zearalenone residues in beer samples
Source: Royal Society of Chemistry journal article supplement (doi:10.1039/c4ay01754d), 2015-01-01

**% signal suppression**

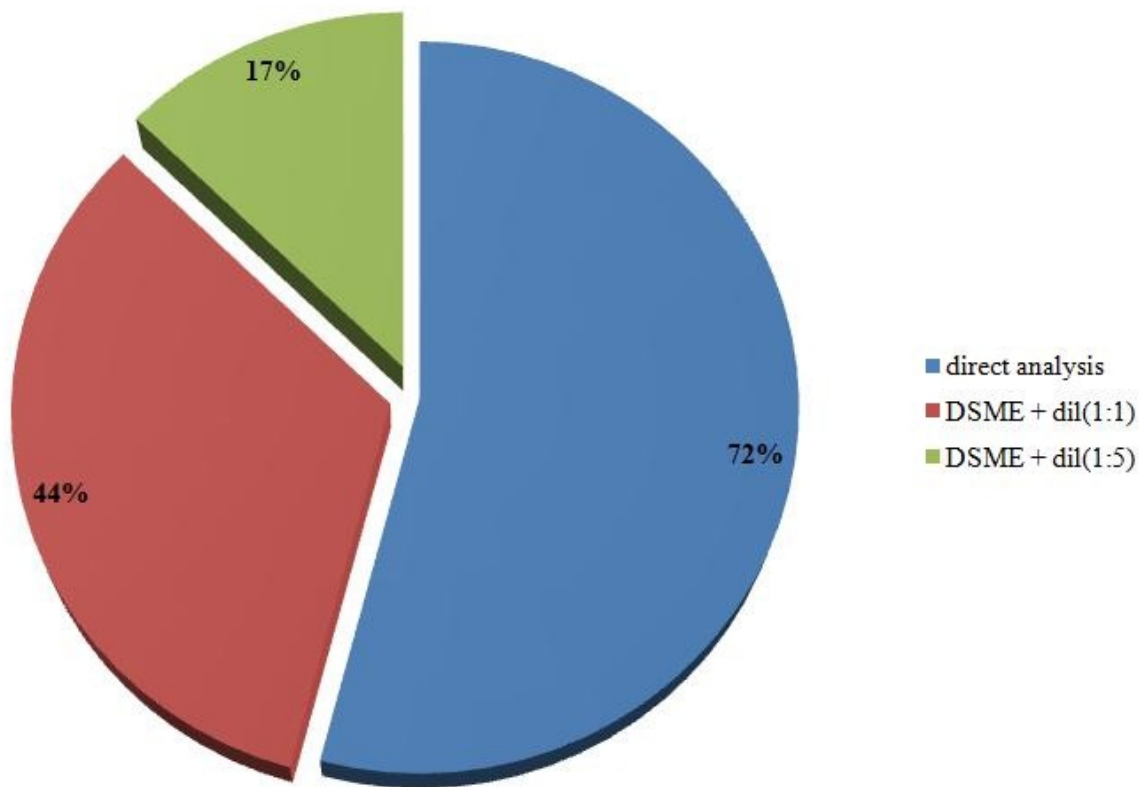

Supplement: c4ay01754d2.pdf [file c4ay01754d2.pdf]
